# Supplementary material for: A constructive branch-and-bound algorithm for the project duration problem with partially renewable resources and general temporal constraints
Source: Springer Nature journal article supplement (doi:10.1007/s10951-022-00735-9), 2022-06-06
Supplement: MOESM1 [file 23133292]

# Supplementary material: A constructive branch-and-bound algorithm for the project duration problem with partially renewable resources and general temporal constraints

*Journal of Scheduling*

Kai Watermeyer · Jürgen Zimmermann

Clausthal University of Technology  
Institute of Management and Economics  
Operations Research Group  
Julius-Albert-Str. 2, 38678 Clausthal-Zellerfeld, Germany

Corresponding author: Kai Watermeyer  
E-mail: kai.watermeyer@tu-clausthal.de  
Jürgen Zimmermann  
E-mail: juergen.zimmermann@tu-clausthal.de

This supplementary document provides a comparison between the constructive branch-and-bound algorithm (CBB) from the associated paper with the relaxation-based branch-and-bound algorithm (RBB) by Watermeyer and Zimmermann (2020). In contrast to the computational studies in the paper, both branch-and-bound algorithms (BnB) are conducted with only one setting over all instances of benchmark set  $UBO\pi$ . Furthermore, this document contains complementary results for the devised serial schedule-generation scheme (SGS).

Tables 2 and 4, which are taken from the corresponding papers, summarize the settings that have been used for both BnB depending on the instance size. For the description of the symbols we refer the reader to the associated papers. In Tables 2 and 4, the different settings are marked by numbers ([1], [2], [3], [4], [5]) that are used in the evaluation tables to identify the settings.

Table 1 shows the results of the experimental performance analysis that has been conducted with a time limit of 300 seconds, where setting [6] of CBB corresponds to setting [5] with a so-called warm-up phase (noted by CBB+W in the paper). Tables 3 and 5 display the results for each test set  $UBO_n\pi$  with  $n = 10, 20, 50, 100, 200$  real activities. The measures are described in the associated paper of this document.

First of all, from Tables 3 and 5 it can be seen that the performance of each setting is highly dependent on the instance size. As a rule, it can be established that settings that show a reasonable performance for small instances are rather not suited for greater instances and vice versa. Table 1 shows in addition that settings that perform well on small instances tend to solve more instances, while settings with a better performance for greater instances are able to determine the solution status for much more instances.

|     | #nTriv | #opt | #feas | #inf | #unk | $\Delta^{lb}$<br>(%) | $\varnothing^{cpu}$<br>(s) | $\varnothing_{opt}^{cpu}$<br>(s) | $\varnothing_{inf}^{cpu}$<br>(s) |       |
|-----|--------|------|-------|------|------|----------------------|----------------------------|----------------------------------|----------------------------------|-------|
| CBB | [1]    | 2791 | 1316  | 1613 | 205  | 973                  | 173.12                     | 139.083                          | 5.237                            | 1.405 |
|     | [2]    |      | 1371  | 2009 | 205  | 577                  | 149.74                     | 134.526                          | 7.861                            | 0.899 |
|     | [3]    |      | 1261  | 1880 | 203  | 708                  | 165.91                     | 145.862                          | 6.692                            | 2.767 |
|     | [4]    |      | 1352  | 2456 | 200  | 135                  | 116.19                     | 137.105                          | 7.802                            | 2.060 |
|     | [5]    |      | 1353  | 2523 | 200  | 68                   | 111.52                     | 137.015                          | 7.708                            | 2.905 |
|     | [6]    |      | 1353  | 2541 | 200  | 50                   | 111.04                     | 137.792                          | 9.209                            | 3.578 |
| RBB | [1]    | 2791 | 1343  | 1581 | 203  | 1007                 | 168.85                     | 137.145                          | 6.623                            | 1.859 |
|     | [2]    |      | 1313  | 1669 | 203  | 919                  | 173.17                     | 140.753                          | 7.611                            | 1.716 |
|     | [3]    |      | 1110  | 2325 | 181  | 285                  | 142.15                     | 163.629                          | 6.024                            | 0.010 |
|     | [4]    |      | 1149  | 2526 | 181  | 84                   | 114.95                     | 160.850                          | 9.252                            | 0.009 |
|     | [5]    |      | 1120  | 2525 | 181  | 85                   | 114.96                     | 163.570                          | 8.501                            | 0.010 |

**Table 1** Performance of CBB and RBB over all instances of benchmark set  $UBO\pi$  (300 s)

Finally, the comparison between the results of CBB and RBB in Table 1 reveals that CBB dominates RBB if only one setting is used over all instances of benchmark set  $UBO\pi$ . In particular, setting [6] for CBB can be identified as the best setting that is able to determine the solution status for the greatest number of instances, while the difference to the highest number of solved instances by setting [2] is rather low.

|                     | UBO10 $\pi$ [1]      | UBO20 $\pi$ [2]                                 | UBO50 $\pi$ [3]                              | UBO100 $\pi$ [4]                                | UBO200 $\pi$ [5]    |
|---------------------|----------------------|-------------------------------------------------|----------------------------------------------|-------------------------------------------------|---------------------|
| Traversing strategy | DFS                  | SPS [2 s]                                       | SPS [5 s]                                    | SPS [5 s]                                       | SPS [5 s]           |
| Branching strategy  | $\bar{C}$ , MRC(max) | $\bar{C}$ , MRC(max)                            | $\prec_D$ , STd <sup>I</sup> (min)           | $\prec_C$ , PF(max)                             | $\prec_C$ , PF(max) |
| Generation strategy | restr-LT [10]        | restr-LT [10]                                   | restr-PV [5]                                 | restr-PV [15]                                   | restr-PV [15]       |
| Ordering strategy   | LB(min)              | LB(min)                                         | LB(min)                                      | LB(min)                                         | LB(min)             |
| Consistency tests   | $\gamma_B^\infty$    | $\gamma_B^\infty, \gamma_D^1[\mathcal{R}_i, 2]$ | $\gamma_B^\infty, \gamma_W^1[\mathcal{R}_i]$ | $\gamma_B^\infty, \gamma_W^1[\mathcal{R}_i, 2]$ | $\gamma_B^\infty$   |
| Lower bound         | $LBD^\pi$            | $LBD^\pi$                                       | $LBD^\pi$                                    | $LBO^\pi$                                       | $LBO^\pi$           |
| Pruning techniques  | UPT                  | UPT                                             | UPT+ULT                                      | UPT+ULT                                         | UPT+ULT             |

**Table 2** Settings of CBB for the performance analysis on benchmark set UBO $\pi$  dependent on the instance size

|              | #nTriv | #opt | #feas | #inf | #unk | $\Delta^{\text{lb}}$<br>(%) | $\varnothing^{\text{cpu}}$<br>(s) | $\varnothing_{\text{opt}}^{\text{cpu}}$<br>(s) | $\varnothing_{\text{inf}}^{\text{cpu}}$<br>(s) |        |
|--------------|--------|------|-------|------|------|-----------------------------|-----------------------------------|------------------------------------------------|------------------------------------------------|--------|
| UBO10 $\pi$  | [1]    | 693  | 534   | 534  | 159  | 0                           | 53.43                             | 0.065                                          | 0.067                                          | 0.056  |
|              | [2]    |      | 534   | 534  | 159  | 0                           | 53.43                             | 0.076                                          | 0.079                                          | 0.063  |
|              | [3]    |      | 534   | 534  | 159  | 0                           | 53.43                             | 0.140                                          | 0.163                                          | 0.063  |
|              | [4]    |      | 534   | 534  | 159  | 0                           | 53.43                             | 0.328                                          | 0.423                                          | 0.008  |
|              | [5]    |      | 534   | 534  | 159  | 0                           | 53.43                             | 0.410                                          | 0.512                                          | 0.066  |
|              | [6]    |      | 534   | 534  | 159  | 0                           | 53.43                             | 0.774                                          | 0.902                                          | 0.343  |
| UBO20 $\pi$  | [1]    | 621  | 532   | 575  | 40   | 6                           | 65.77                             | 29.458                                         | 6.708                                          | 0.618  |
|              | [2]    |      | 537   | 581  | 40   | 0                           | 64.67                             | 28.086                                         | 7.846                                          | 0.702  |
|              | [3]    |      | 482   | 580  | 39   | 2                           | 65.16                             | 54.821                                         | 7.523                                          | 10.707 |
|              | [4]    |      | 476   | 580  | 36   | 5                           | 65.98                             | 59.072                                         | 7.835                                          | 7.062  |
|              | [5]    |      | 473   | 580  | 36   | 5                           | 66.11                             | 61.108                                         | 8.596                                          | 7.835  |
|              | [6]    |      | 474   | 580  | 36   | 5                           | 66.09                             | 62.242                                         | 10.558                                         | 9.655  |
| UBO50 $\pi$  | [1]    | 527  | 161   | 326  | 6    | 195                         | 119.24                            | 209.408                                        | 13.065                                         | 42.412 |
|              | [2]    |      | 183   | 432  | 6    | 89                          | 103.78                            | 197.638                                        | 14.256                                         | 24.356 |
|              | [3]    |      | 183   | 491  | 5    | 31                          | 88.16                             | 198.016                                        | 13.774                                         | 26.827 |
|              | [4]    |      | 172   | 489  | 5    | 33                          | 90.03                             | 204.891                                        | 16.402                                         | 31.301 |
|              | [5]    |      | 167   | 489  | 5    | 33                          | 90.20                             | 207.570                                        | 15.576                                         | 57.677 |
|              | [6]    |      | 166   | 489  | 5    | 33                          | 90.20                             | 207.787                                        | 14.399                                         | 62.711 |
| UBO100 $\pi$ | [1]    | 484  | 58    | 128  | 0    | 356                         | 290.71                            | 266.203                                        | 17.972                                         | –      |
|              | [2]    |      | 78    | 302  | 0    | 182                         | 237.99                            | 257.415                                        | 35.754                                         | –      |
|              | [3]    |      | 62    | 275  | 0    | 209                         | 242.46                            | 266.125                                        | 35.559                                         | –      |
|              | [4]    |      | 85    | 472  | 0    | 12                          | 168.68                            | 249.827                                        | 14.307                                         | –      |
|              | [5]    |      | 84    | 471  | 0    | 13                          | 168.92                            | 250.723                                        | 16.073                                         | –      |
|              | [6]    |      | 84    | 472  | 0    | 12                          | 168.87                            | 251.274                                        | 19.244                                         | –      |
| UBO200 $\pi$ | [1]    | 466  | 31    | 50   | 0    | 416                         | 432.97                            | 280.345                                        | 4.540                                          | –      |
|              | [2]    |      | 39    | 160  | 0    | 306                         | 366.66                            | 277.304                                        | 28.812                                         | –      |
|              | [3]    |      | 0     | 0    | 0    | 466                         | 475.85                            | 300.000                                        | –                                              | –      |
|              | [4]    |      | 85    | 381  | 0    | 85                          | 251.50                            | 250.763                                        | 30.066                                         | –      |
|              | [5]    |      | 95    | 449  | 0    | 17                          | 222.93                            | 243.429                                        | 22.502                                         | –      |
|              | [6]    |      | 95    | 466  | 0    | 0                           | 220.09                            | 245.209                                        | 31.234                                         | –      |

**Table 3** Performance of CBB on benchmark set UBO $\pi$  (300 s)

|                     | UBO10 $\pi$ [1]                                  | UBO20 $\pi$ [2]                                  | UBO50 $\pi$ [3]                              | UBO100 $\pi$ [4]                                | UBO200 $\pi$ [5]          |
|---------------------|--------------------------------------------------|--------------------------------------------------|----------------------------------------------|-------------------------------------------------|---------------------------|
| Traversing strategy | DFS                                              | SPS <sup>+</sup> [2 s]                           | SPS <sup>+</sup> [5 s]                       | SPS <sup>+</sup> [15 s]                         | SPS <sup>+</sup> [15 s]   |
| Branching strategy  | NCA(min)                                         | NCA(min)                                         | DST(max)                                     | DST <sup>I</sup> (max)                          | DST <sup>I</sup> (max)    |
| Generation strategy | all                                              | all                                              | all                                          | restrCL [10]                                    | restrCL [10]              |
| Ordering strategy   | LB(min)                                          | LB(min)                                          | LB-DST(min)                                  | LB-DST <sup>I</sup> (min)                       | LB-DST <sup>I</sup> (min) |
| Consistency tests   | $\gamma_B^\infty, \gamma_W^1[\mathcal{R}_i, 10]$ | $\gamma_B^\infty, \gamma_W^1[\mathcal{R}_i, 10]$ | $\gamma_B^\infty, \gamma_D^1[\mathcal{R}_i]$ | $\gamma_B^\infty, \gamma_D^1[\mathcal{R}_i, 5]$ | $\gamma_B^\infty$         |
| Lower bound         | $LBD^\pi$                                        | $LBD^\pi$                                        | $LBD^\pi$                                    | $LBO^\pi$                                       | $LBO^\pi$                 |
| Partitioning        | x                                                | x                                                | -                                            | -                                               | -                         |

**Table 4** Settings of RBB for the performance analysis on benchmark set UBO $\pi$  dependent on the instance size

*Note.* From “A branch-and-bound procedure for the resource-constrained project scheduling problem with partially renewable resources and general temporal constraints” by K. Watermeyer and J. Zimmermann, 2020, OR Spectrum, 42(2), p. 456 (<https://doi.org/10.1007/s00291-020-00583-z>). CC BY 4.0 (<https://creativecommons.org/licenses/by/4.0/>).

|              | #nTriv | #opt | #feas | #inf | #unk | $\Delta^{\text{lb}}$<br>(%) | $\varnothing^{\text{cpu}}$<br>(s) | $\varnothing_{\text{opt}}^{\text{cpu}}$<br>(s) | $\varnothing_{\text{inf}}^{\text{cpu}}$<br>(s) |       |
|--------------|--------|------|-------|------|------|-----------------------------|-----------------------------------|------------------------------------------------|------------------------------------------------|-------|
| UBO10 $\pi$  | [1]    | 693  | 534   | 534  | 159  | 0                           | 53.43                             | 0.032                                          | 0.040                                          | 0.004 |
|              | [2]    |      | 534   | 534  | 159  | 0                           | 53.43                             | 0.035                                          | 0.044                                          | 0.004 |
|              | [3]    |      | 508   | 534  | 157  | 2                           | 53.62                             | 14.084                                         | 2.676                                          | 0.005 |
|              | [4]    |      | 501   | 534  | 157  | 2                           | 53.75                             | 17.804                                         | 3.668                                          | 0.004 |
|              | [5]    |      | 493   | 534  | 157  | 2                           | 53.71                             | 21.113                                         | 3.510                                          | 0.004 |
| UBO20 $\pi$  | [1]    | 621  | 497   | 560  | 40   | 21                          | 67.35                             | 48.082                                         | 8.671                                          | 8.733 |
|              | [2]    |      | 500   | 578  | 40   | 3                           | 65.09                             | 46.149                                         | 8.076                                          | 8.006 |
|              | [3]    |      | 361   | 578  | 21   | 22                          | 69.51                             | 117.381                                        | 3.306                                          | 0.011 |
|              | [4]    |      | 351   | 576  | 21   | 24                          | 70.45                             | 124.690                                        | 7.783                                          | 0.010 |
|              | [5]    |      | 338   | 575  | 21   | 25                          | 70.46                             | 130.852                                        | 7.866                                          | 0.012 |
| UBO50 $\pi$  | [1]    | 527  | 174   | 255  | 4    | 268                         | 128.33                            | 201.974                                        | 9.843                                          | 6.869 |
|              | [2]    |      | 188   | 348  | 4    | 175                         | 112.44                            | 195.959                                        | 14.591                                         | 6.852 |
|              | [3]    |      | 145   | 486  | 3    | 38                          | 95.49                             | 217.958                                        | 8.022                                          | 0.279 |
|              | [4]    |      | 136   | 486  | 3    | 38                          | 96.32                             | 223.597                                        | 10.550                                         | 0.286 |
|              | [5]    |      | 133   | 484  | 3    | 40                          | 96.57                             | 225.069                                        | 9.852                                          | 0.292 |
| UBO100 $\pi$ | [1]    | 484  | 78    | 127  | 0    | 357                         | 286.91                            | 253.566                                        | 11.869                                         | -     |
|              | [2]    |      | 73    | 164  | 0    | 320                         | 285.48                            | 258.908                                        | 27.555                                         | -     |
|              | [3]    |      | 72    | 386  | 0    | 98                          | 226.00                            | 260.174                                        | 32.279                                         | -     |
|              | [4]    |      | 79    | 465  | 0    | 19                          | 174.30                            | 254.409                                        | 20.681                                         | -     |
|              | [5]    |      | 77    | 466  | 0    | 18                          | 174.74                            | 255.554                                        | 20.623                                         | -     |
| UBO200 $\pi$ | [1]    | 466  | 60    | 105  | 0    | 361                         | 398.94                            | 265.503                                        | 32.076                                         | -     |
|              | [2]    |      | 18    | 45   | 0    | 421                         | 447.29                            | 290.938                                        | 65.395                                         | -     |
|              | [3]    |      | 24    | 341  | 0    | 125                         | 336.24                            | 285.936                                        | 26.915                                         | -     |
|              | [4]    |      | 82    | 465  | 0    | 1                           | 224.73                            | 253.631                                        | 36.489                                         | -     |
|              | [5]    |      | 79    | 466  | 0    | 0                           | 224.03                            | 253.934                                        | 28.271                                         | -     |

**Table 5** Performance of RBB on benchmark set UBO $\pi$  (300 s)

Table 6 provides the results of the devised SGS in the associated paper for the Böttcher and SAV benchmark set. The results in Table 6 were obtained by using the priority rules LST and ST with  $\text{ext} = \min$  over all test sets of the Böttcher and SAV benchmark set, respectively. The calculation of  $T_i$  as well as the application of both improving techniques result in a better performance on both benchmark sets. A closer look on the results even show that this is also the case for each single test set. The best variant of SGS (+UPT) shows a reasonable performance. Only for the Böttcher benchmark set, SGS is not able to determine a feasible solution for each instance that was feasibly solved by CBB. It is worth mentioning that SGS with all improving techniques clearly outperforms the results of the SGS by Schirmer (1999) and Böttcher et al. (1999) on the Schirmer instances (J10 $\pi$ , J20 $\pi$ , J30 $\pi$ , J40 $\pi$ ) in terms of the number of feasibly solved instances as reported in Table 17.2 in Schirmer (1999, Sect. 17). For this comparison we have conducted computational experiments on the Schirmer instances by including all trivial instances in accordance with the investigations in Schirmer (1999). Thereby, SGS was able to determine a feasible solution for each trivial instance.

|          |                   | $Z = 100$ |        |                             |                              | $Z = 1000$                        |        |                             |                              |                                   |
|----------|-------------------|-----------|--------|-----------------------------|------------------------------|-----------------------------------|--------|-----------------------------|------------------------------|-----------------------------------|
|          |                   | #inst     | #nfeas | $\Delta^{\text{lb}}$<br>(%) | $\Delta^{\text{CBB}}$<br>(%) | $\varnothing^{\text{cpu}}$<br>(s) | #nfeas | $\Delta^{\text{lb}}$<br>(%) | $\Delta^{\text{CBB}}$<br>(%) | $\varnothing^{\text{cpu}}$<br>(s) |
| Böttcher | SGS( $\Theta_i$ ) |           | 86     | 46.76                       | 2.04                         | 0.074                             | 54     | 44.72                       | 0.66                         | 0.113                             |
|          | SGS( $T_i$ )      |           | 71     | 45.08                       | 0.68                         | 0.075                             | 49     | 44.25                       | 0.26                         | 0.117                             |
|          | +RB               | 1399      | 53     | 44.12                       | 0.06                         | 0.072                             | 45     | 43.90                       | 0.03                         | 0.104                             |
|          | +UPT              |           | 43     | 43.91                       | 0.05                         | 0.072                             | 37     | 43.76                       | 0.09                         | 0.104                             |
|          | CBB               |           | 22     | 43.28                       | 0.00                         | 6.525                             |        |                             |                              |                                   |
| SAV      | SGS( $\Theta_i$ ) |           | 40     | 19.23                       | 9.95                         | 0.178                             | 11     | 10.06                       | 2.17                         | 0.476                             |
|          | SGS( $T_i$ )      |           | 29     | 16.60                       | 7.72                         | 0.166                             | 10     | 9.82                        | 1.97                         | 0.482                             |
|          | +RB               | 2553      | 11     | 14.83                       | 6.28                         | 0.164                             | 4      | 9.11                        | 1.42                         | 0.467                             |
|          | +UPT              |           | 0      | 10.86                       | 3.05                         | 0.117                             | 0      | 7.76                        | 0.35                         | 0.331                             |
|          | CBB               |           | 0      | 7.34                        | 0.00                         | 18.834                            |        |                             |                              |                                   |

**Table 6** Performance of SGS on the Böttcher and SAV benchmark set
